# Supplementary material
Source: publisher figshare collection journal article supplement (https://acs.figshare.com/ndownloader/files/21305283)
Supplement: Supplementary file 1 [file 21305283]

## Supporting Information

# Intact Protein Mass Spectrometry of Cell Culture Harvest Guides Cell Line Development for Tri-specific Antibodies

Fateme Tousi<sup>1\*</sup>, Yan Jiang<sup>1</sup>, Sharmila Sivendran<sup>1</sup>, Yvonne Song<sup>1</sup>, Susan Elliott<sup>2§</sup>, Anthony Paiva<sup>2</sup>, Anders Lund<sup>1†</sup>, Karen Albee<sup>1</sup>, Karen Lee<sup>1</sup>

<sup>1</sup> Department of Bioanalytics, Biologics Development, Sanofi, Framingham, Massachusetts 01701, United States

<sup>2</sup> Cell Line Development, Biologics Development, Sanofi, Framingham, Massachusetts 01701, United States

§ Current affiliation: Rubius Therapeutics, Cambridge, Massachusetts 02139, United States

† Current affiliation: Synlogic Inc., Cambridge, Massachusetts 02142, United States

### Corresponding Author

\* Email: [Fateme.tousi@sanofi.com](mailto:Fateme.tousi@sanofi.com)

### ORCID

Fateme Tousi: 0000-0002-4041-9274

### Table of Contents

**Figure S1.** Raw and deconvoluted mass spectra obtained by SEC-LC-MS analysis of (a) clarified harvest and (b) ProA purified anti-CD38 TCE showing comparability of the two methods. Annotations on the deconvoluted spectra show the experimental masses and %intensities of each species.

**Figure S2.** Ranking anti-HER2 TCE clones based on (a) percentage of correct tsAb mass (purity) and (b) productivity measured by titer for the same clones.

**Figure S3.** Effect of different growth conditions on chain mispairing and half antibody levels in anti-CD38 TCE clones grown under (a) and (b) two different fed-batch conditions in ambr15 bioreactor and (c) batch culture condition in spin tubes.

**Figure S4.** Effect of different growth conditions on chain mispairing levels in anti-HER2 TCE clones grown under (a) fed-batch in ambr15 bioreactor (b) batch culture condition in spin tubes.

**Figure S5.** Evaluating the performance of the SEC column by running a reduced mAb sample (a) at the beginning and (b) at the end of a queue of 50 clarified cell culture harvest samples tested for mispairing by intact protein mass spectrometry. First peak at RT=5.30 minute is the heavy chain and the second peak at RT=6.65 minute is the light chain.

**Table S1.** Relative levels of mis-paired and reference masses and precision results in triplicate analysis of different column loads for anti-CD38 TCE and anti-HER2 TCE harvest samples.

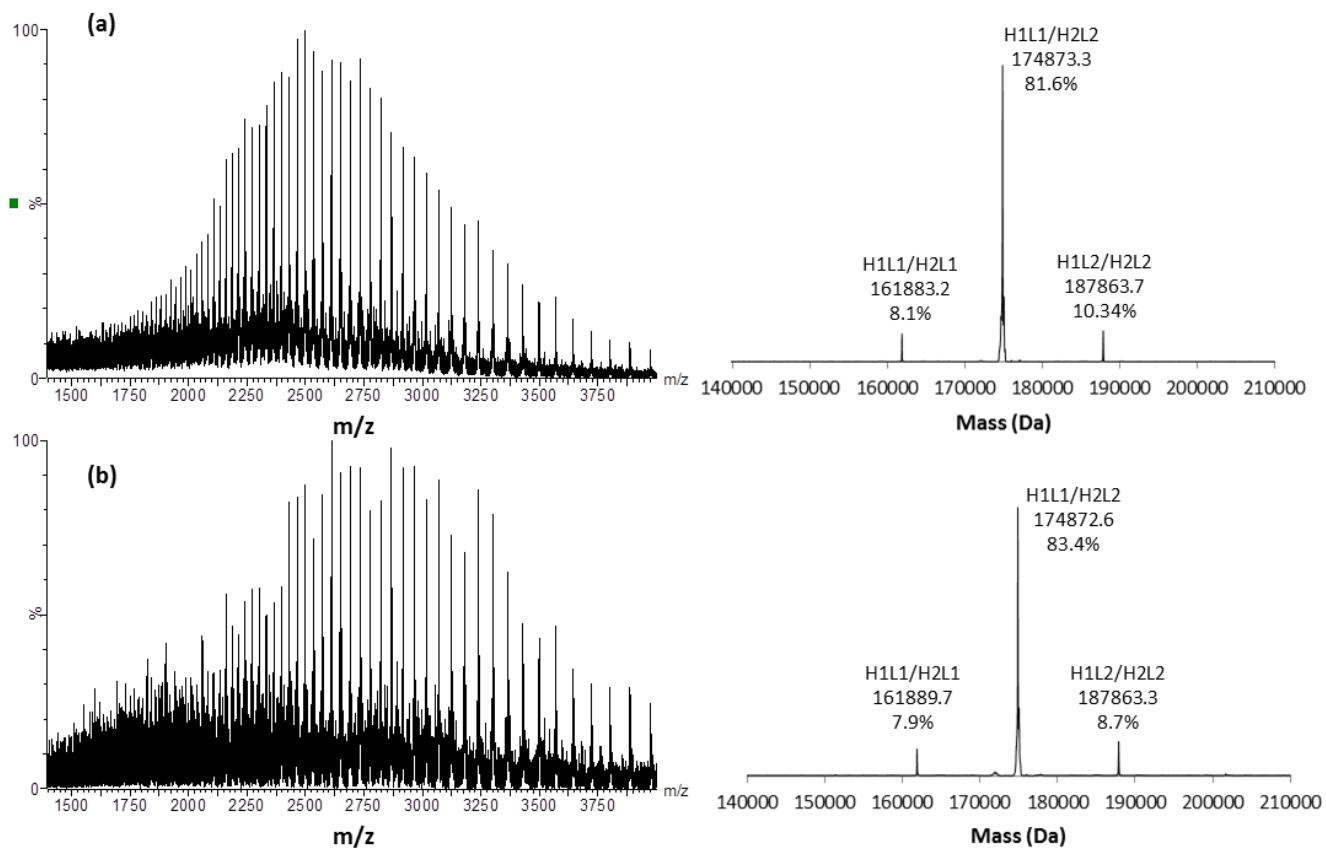

**Figure S1.** Raw and deconvoluted mass spectra obtained by SEC-LC-MS analysis of (a) clarified harvest and (b) ProA purified anti-CD38 TCE showing comparability of the two methods. Annotations on the deconvoluted spectra show the experimental masses and %intensities of each species.

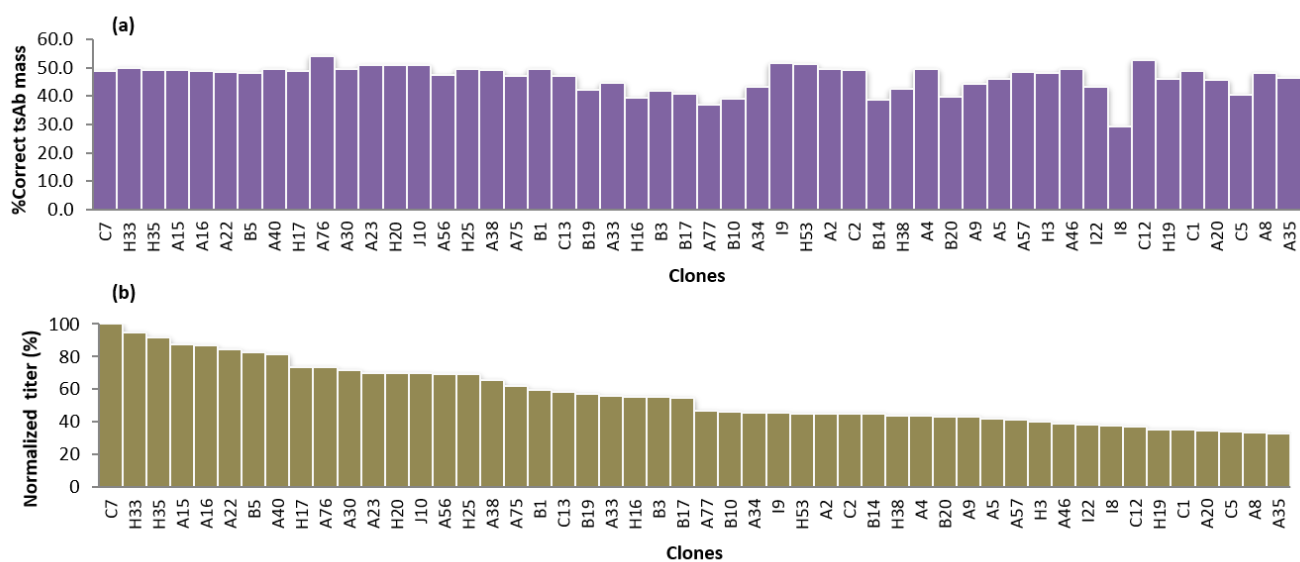

**Figure S2.** Ranking HER2 TCE clones based on (a) percentage of correct tsAb mass (purity) and (b) productivity measured by titer for the same clones.

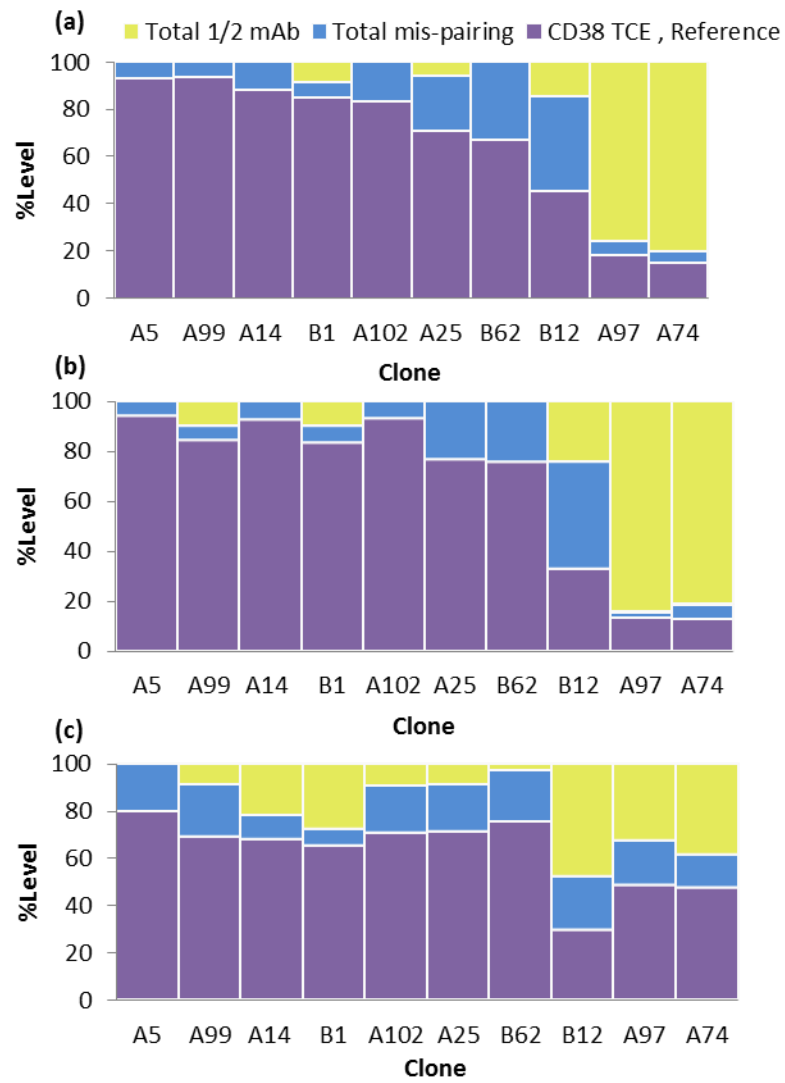

**Figure S3.** Effect of different growth conditions on chain mispairing and half antibody levels in anti-CD38 TCE clones grown under (a) and (b) two different fed-batch conditions in ambr15 bioreactor and (c) batch culture condition in spin tubes.

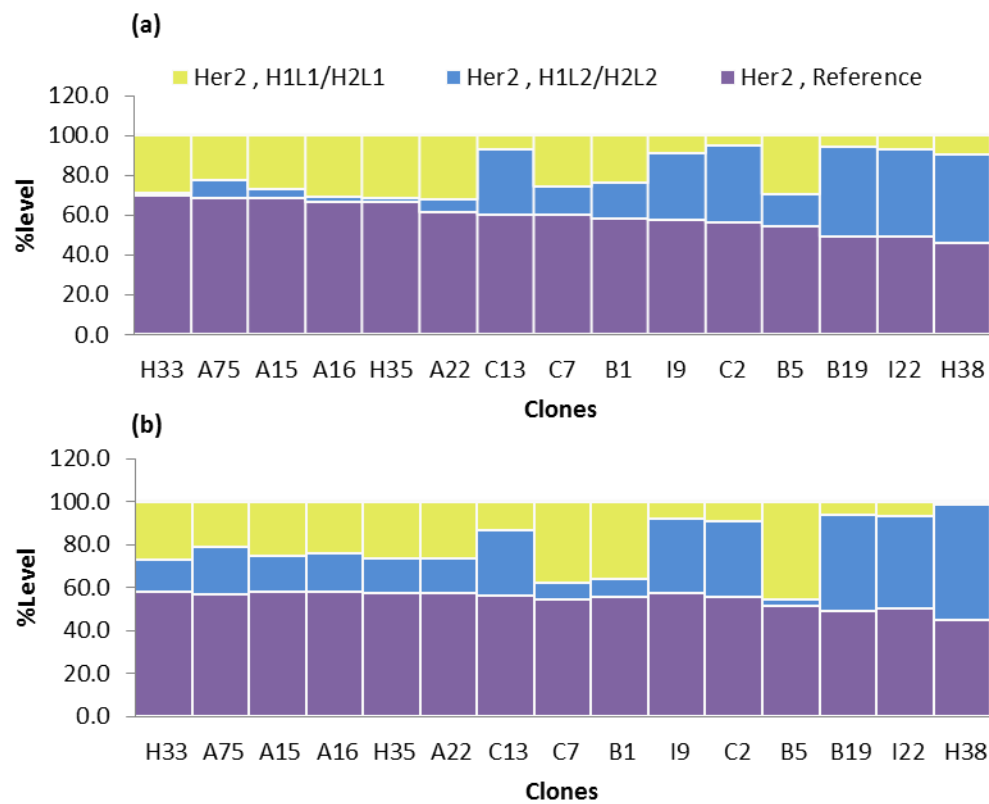

**Figure S4.** Effect of different growth conditions on chain mispairing levels in anti-HER2 TCE clones grown under (a) fed-batch in ambr15 bioreactor (b) batch culture condition in spin tubes.

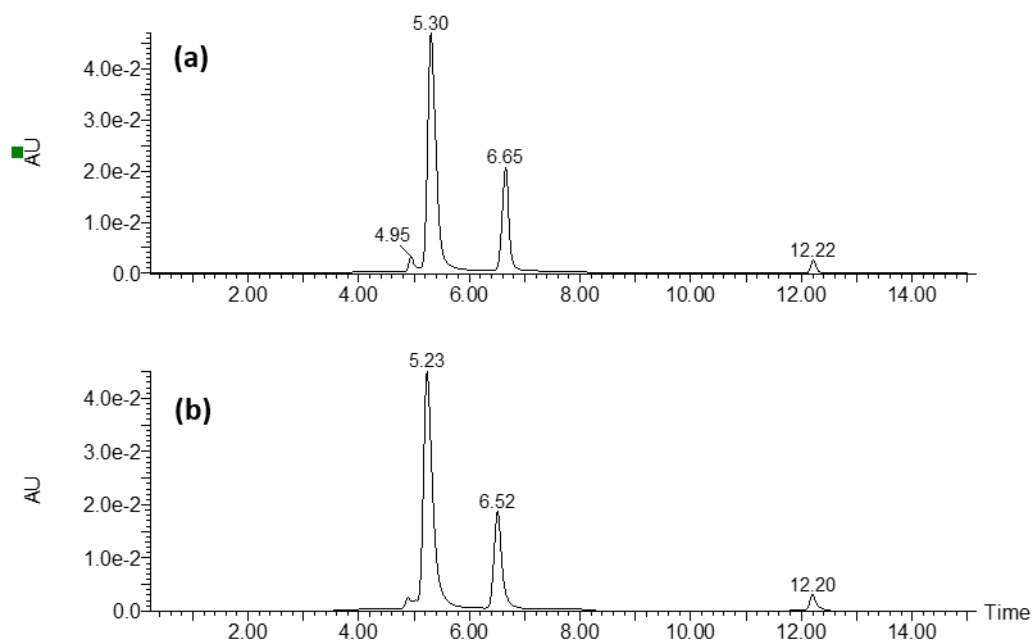

**Figure S5.** Evaluating the performance of the SEC column by running a reduced mAb sample (a) at the beginning and (b) at the end of a queue of 50 clarified cell culture harvest samples tested for mispairing by intact protein mass spectrometry. First peak at RT=5.30 minute is the heavy chain and the second peak at RT=6.65 minute is the light chain.

**Table S1.** Relative levels of mis-paired and reference masses and precision results for triplicate analysis of anti-CD38 TCE and anti-HER2 TCE harvest samples at different column loads.

| tsAb construct | Harvest injection volume (μL) | Column load (μg protein) | Ref. mass |      | H1L1/H2L1 |      | H1L2/H2L2 |      |
|----------------|-------------------------------|--------------------------|-----------|------|-----------|------|-----------|------|
|                |                               |                          | Mean      | %RSD | Mean      | %RSD | Mean      | %RSD |
| anti-HER2 TCE  | 10                            | 4.4                      | 57.9      | 0.5  | 26.0      | 0.7  | 16.2      | 1.1  |
|                | 20                            | 8.7                      | 55.7      | 0.4  | 27.0      | 1.8  | 17.3      | 2.8  |
|                | 30                            | 13.1                     | 55.9      | 0.8  | 26.9      | 1.7  | 17.2      | 2.0  |
|                | 40                            | 17.4                     | 55.8      | 1.0  | 27.0      | 1.0  | 17.1      | 2.6  |
|                | 50                            | 21.8                     | 57.5      | 3.5  | 25.8      | 6.3  | 16.7      | 2.3  |
| anti-CD38 TCE  | 10                            | 11.0                     | 83.3      | 0.7  | 6.3       | 2.6  | 10.4      | 4.3  |
|                | 20                            | 22.0                     | 83.0      | 1.2  | 6.6       | 10.4 | 10.2      | 3.1  |
|                | 30                            | 33.0                     | 81.9      | 0.7  | 6.8       | 9.3  | 10.0      | 6.4  |
|                | 40                            | 44.0                     | 82.7      | 0.7  | 7.0       | 6.0  | 10.0      | 6.2  |
|                | 50                            | 55.0                     | 82.8      | 0.9  | 7.2       | 8.8  | 10.0      | 6.5  |
